# Supplementary material
Source: publisher figshare collection journal article supplement (https://acs.figshare.com/ndownloader/files/3737833)
Supplement: Supplementary file 1 [file 3737833]

## Supporting Information

# Superior Oxygen Stability of *N*-Heterocyclic Carbene-coated Au Nanocrystals – Comparison with Dodecanethiol

Xiang Ling,<sup>a,b,c</sup> Nicolas, Schaeffer,<sup>a,b</sup> Sylvain Roland,<sup>\*c</sup> and Marie-Paule Pileni<sup>\*a,b,d</sup>

<sup>a</sup> Sorbonne Universités, UPMC-Univ Paris 6, UMR 8233, MONARIS, F-75005, Paris, France

<sup>b</sup> CNRS, UMR 8233, MONARIS, F-75005, Paris, France

<sup>c</sup> Sorbonne Universités, UPMC-Univ Paris 6, UMR 8232, Institut Parisien de Chimie Moléculaire, F-75005, Paris, France

<sup>d</sup> CEA/IRAMIS, CEA Saclay, 91191, Gif-Sur-Yvette, France

### Table of contents

|            |    |
|------------|----|
| Figure S1  | 2  |
| Figure S2  | 3  |
| Figure S3  | 4  |
| Figure S4  | 5  |
| Figure S5  | 6  |
| Figure S6  | 7  |
| Figure S7  | 8  |
| Figure S8  | 9  |
| Figure S9  | 10 |
| Figure S10 | 11 |
| Figure S11 | 12 |
| Figure S12 | 13 |
| Figure S13 | 14 |
| Figure S14 | 15 |
| Figure S15 | 16 |

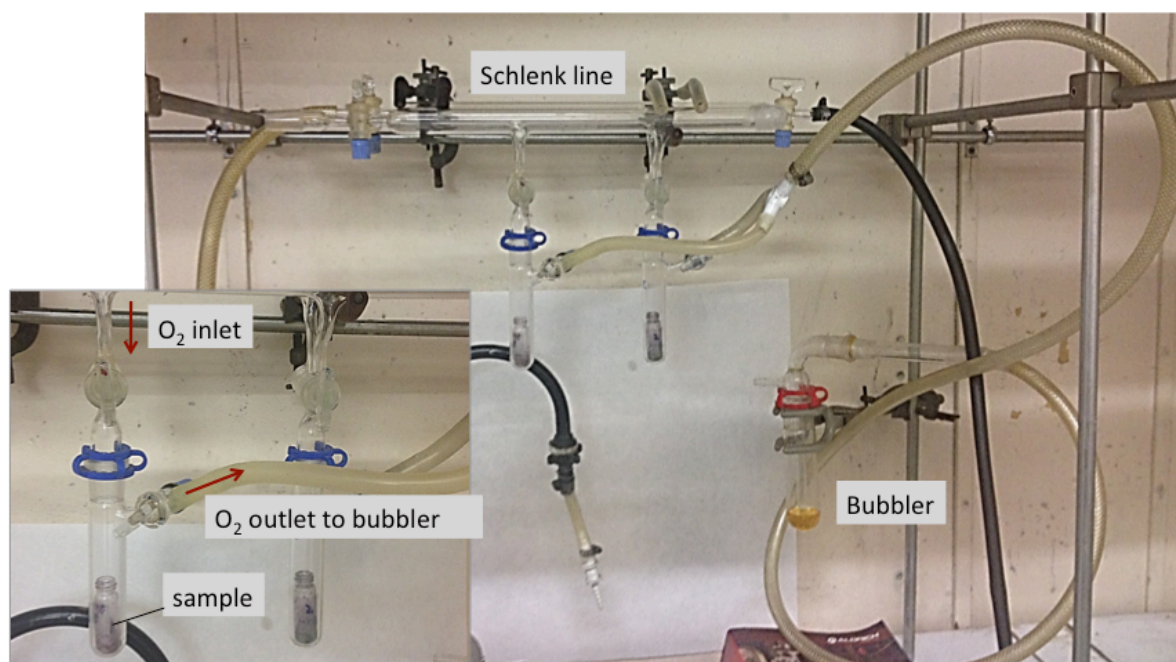

**Figure S1.** Set-up for one-week exposure of Au nanocrystals to molecular oxygen at a pressure of c.a. 1 atm. The vacuum/O<sub>2</sub> manifold (“Schlenk line”) was used to evaporate the solvent at the beginning of the experiment and introduce gaseous molecular oxygen. The gas outlet was equipped with a bubbler system. A slight flow of O<sub>2</sub> was maintained (c.a. one bubble every 5 s) so as the sample remains under oxygen for the time required.

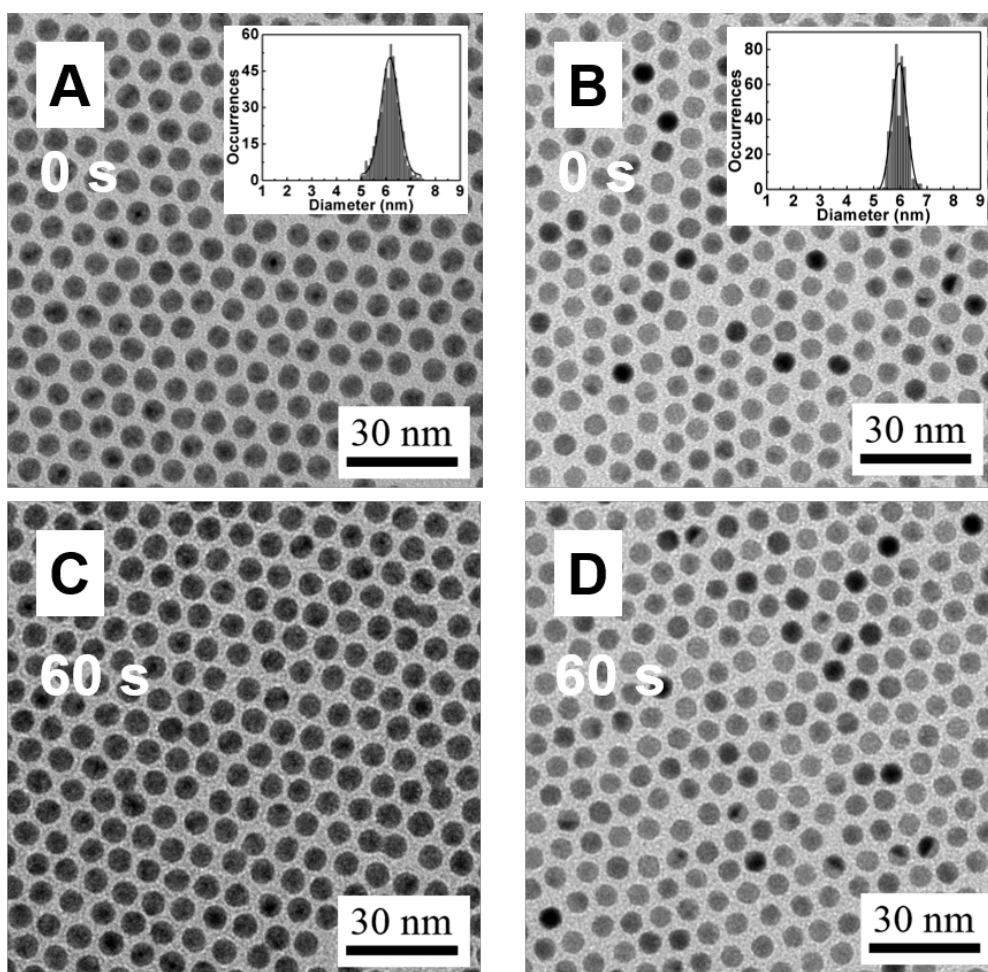

**Figure S2.** TEM images of  $^{DDT}Au^1$  (A) and  $^{DDT}Au^2$  (B), deposited on a TEM grid covered by amorphous carbon, before oxygen plasma exposure. Same areas after exposure to oxygen plasma for 60 s at 10 W : (C)  $^{DDT}Au^1$  and (D)  $^{DDT}Au^2$ .

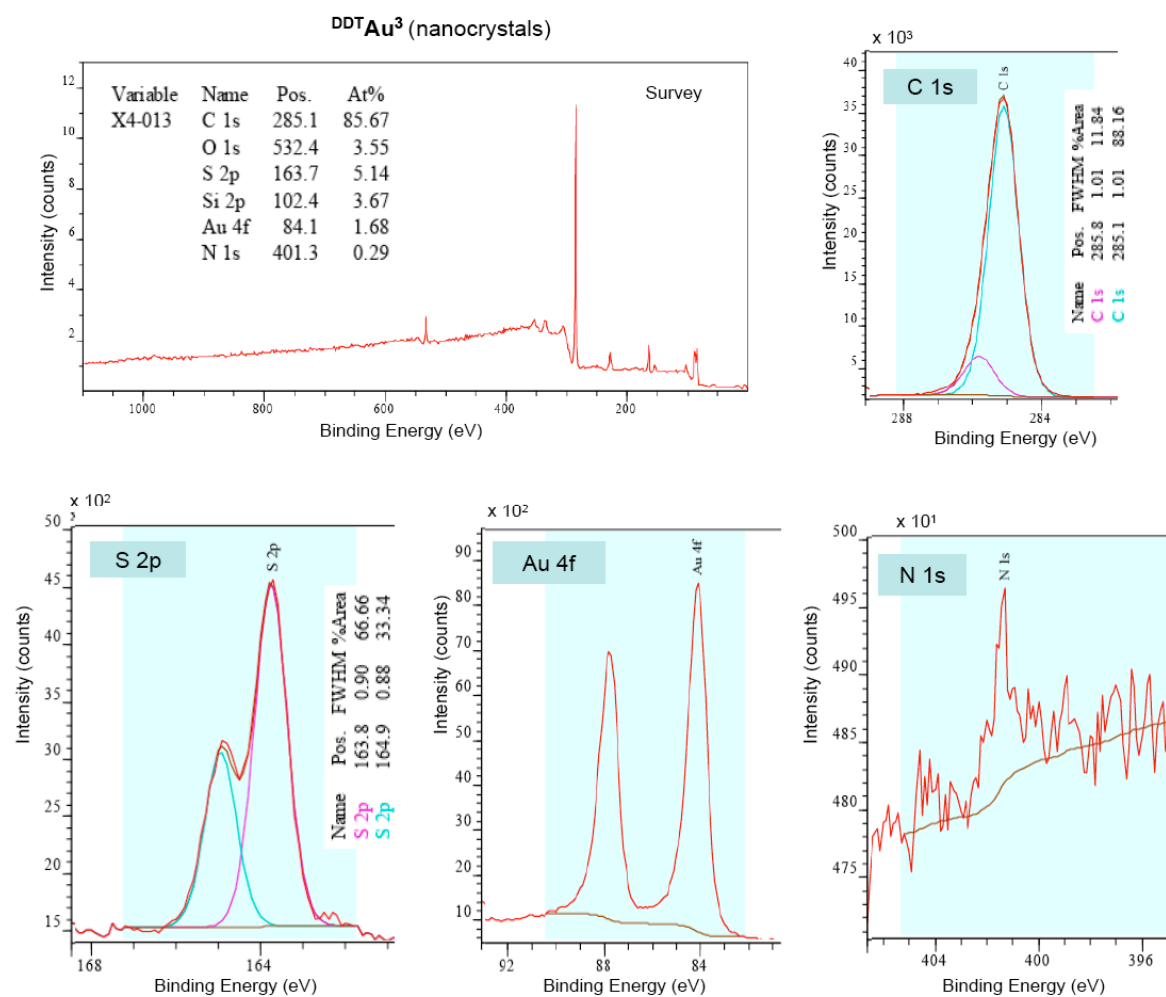

**Figure S3.** XPS spectra of **DDT<sup>+</sup>Au<sup>3+</sup>**. The following ratio are obtained from the data : S/Au = 3.1 ; N/Au = 0.17 ; S/N = 17.7. Under the assumption that the only nitrogen source is the NHC ligand, this leads to S/NHC = 35.4 and NHC/Au = 0.086.



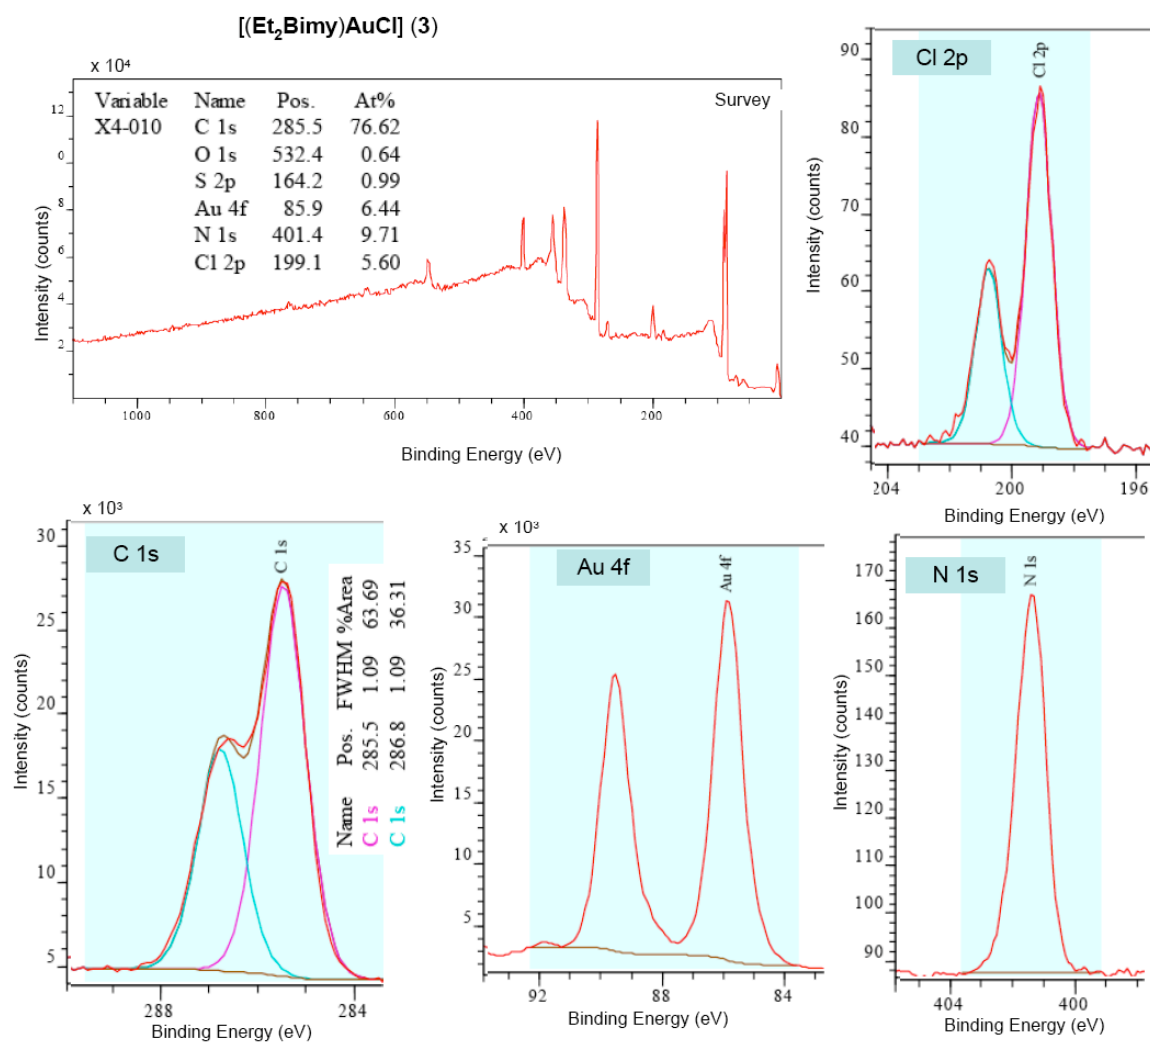

**Figure S4.** XPS spectra of the well-defined gold(I) complex [(Et<sub>2</sub>Bimy)AuCl] (3).

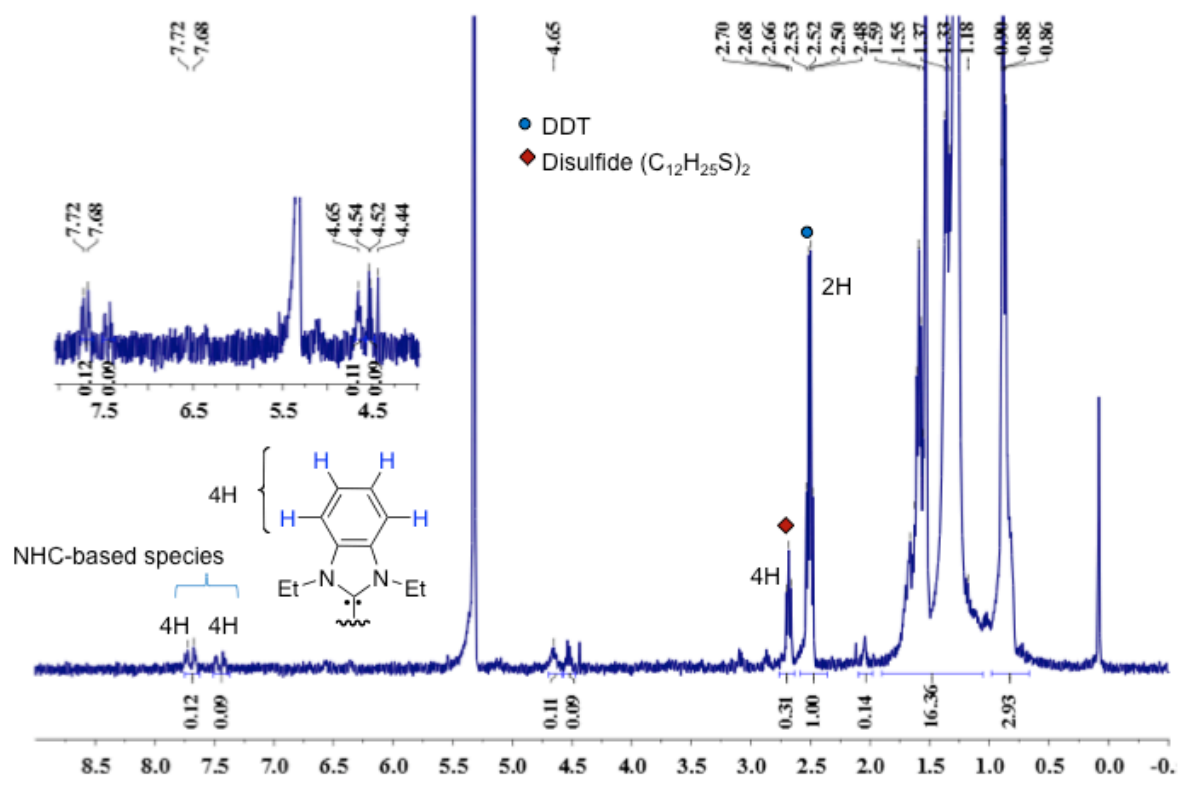

**Figure S5.**  $^1\text{H}$  NMR spectrum of  $^{\text{DDT}}\text{Au}^3$  in  $\text{CD}_2\text{Cl}_2$  (400 MHz). DDT = dodecanethiol ( $\text{C}_{12}\text{H}_{25}\text{SH}$ ).

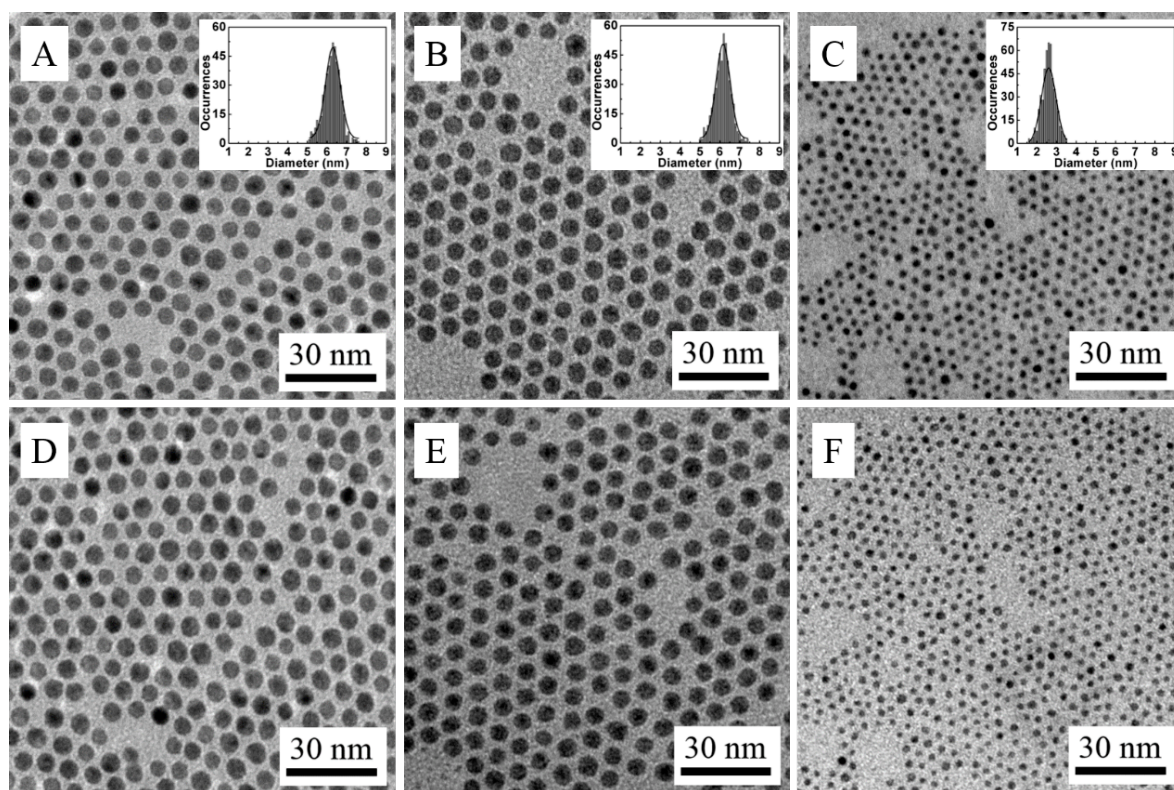

**Figure S6.** TEM images of  $^{DDT}Au^3$  (A),  $^{DDT}Au^4$  (B), and  $^{DDT}Au^5$  (C), deposited on a TEM grid covered by amorphous carbon, before oxygen plasma exposure. Same areas after exposure to oxygen plasma for 60 s at 10 W : (D)  $^{DDT}Au^3$ , (E)  $^{DDT}Au^4$ , and (F)  $^{DDT}Au^5$ .

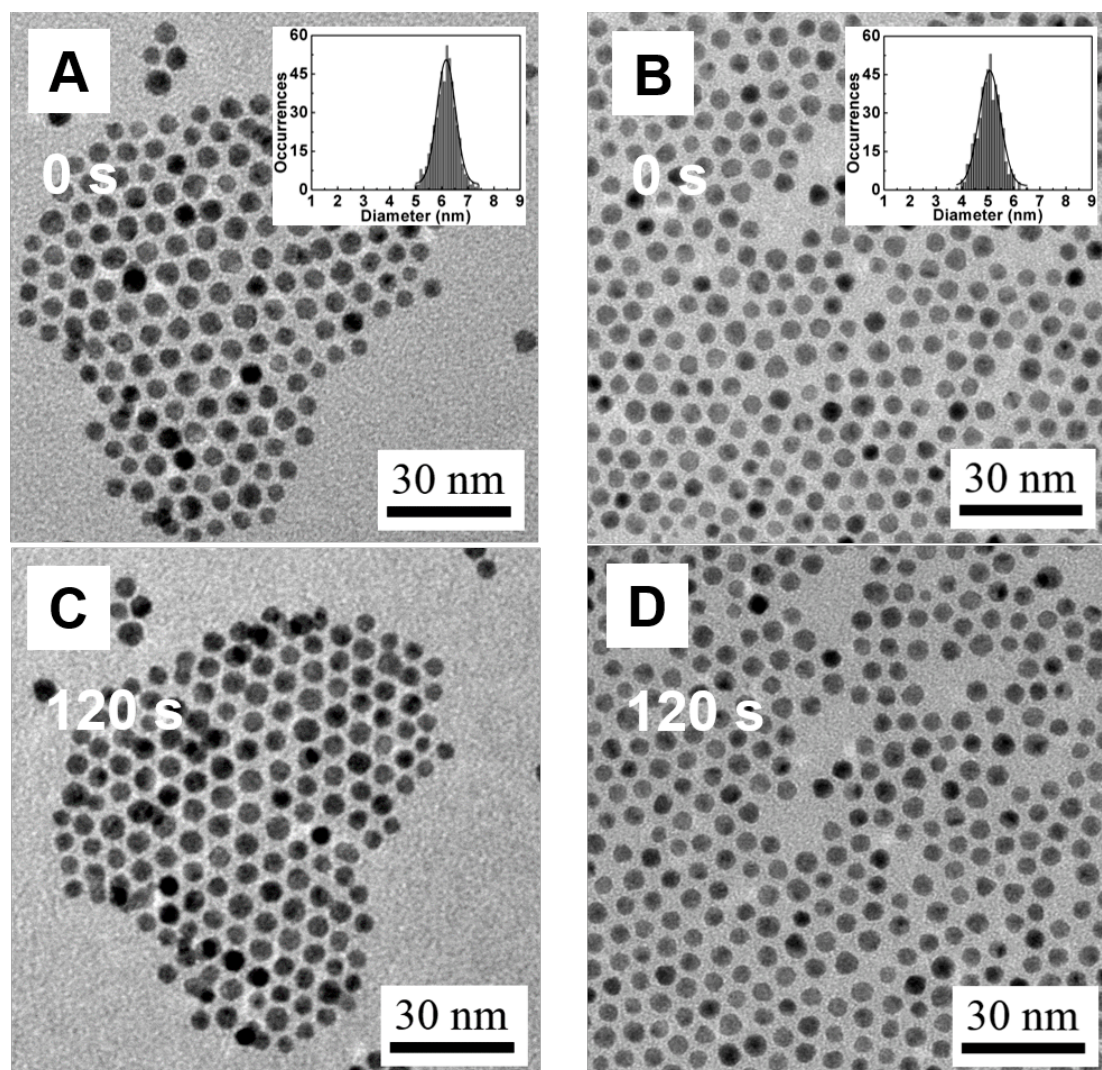

**Figure S7.** TEM images of  ${}^{\text{NHC}}\text{Au}^7$  (A) and  ${}^{\text{NHC}}\text{Au}^9$  (B) deposited on a TEM grid covered by amorphous carbon before oxygen plasma exposure. Same areas after exposure to oxygen plasma for 120 s at 10 W : (C)  ${}^{\text{NHC}}\text{Au}^7$  and (D)  ${}^{\text{NHC}}\text{Au}^9$ .



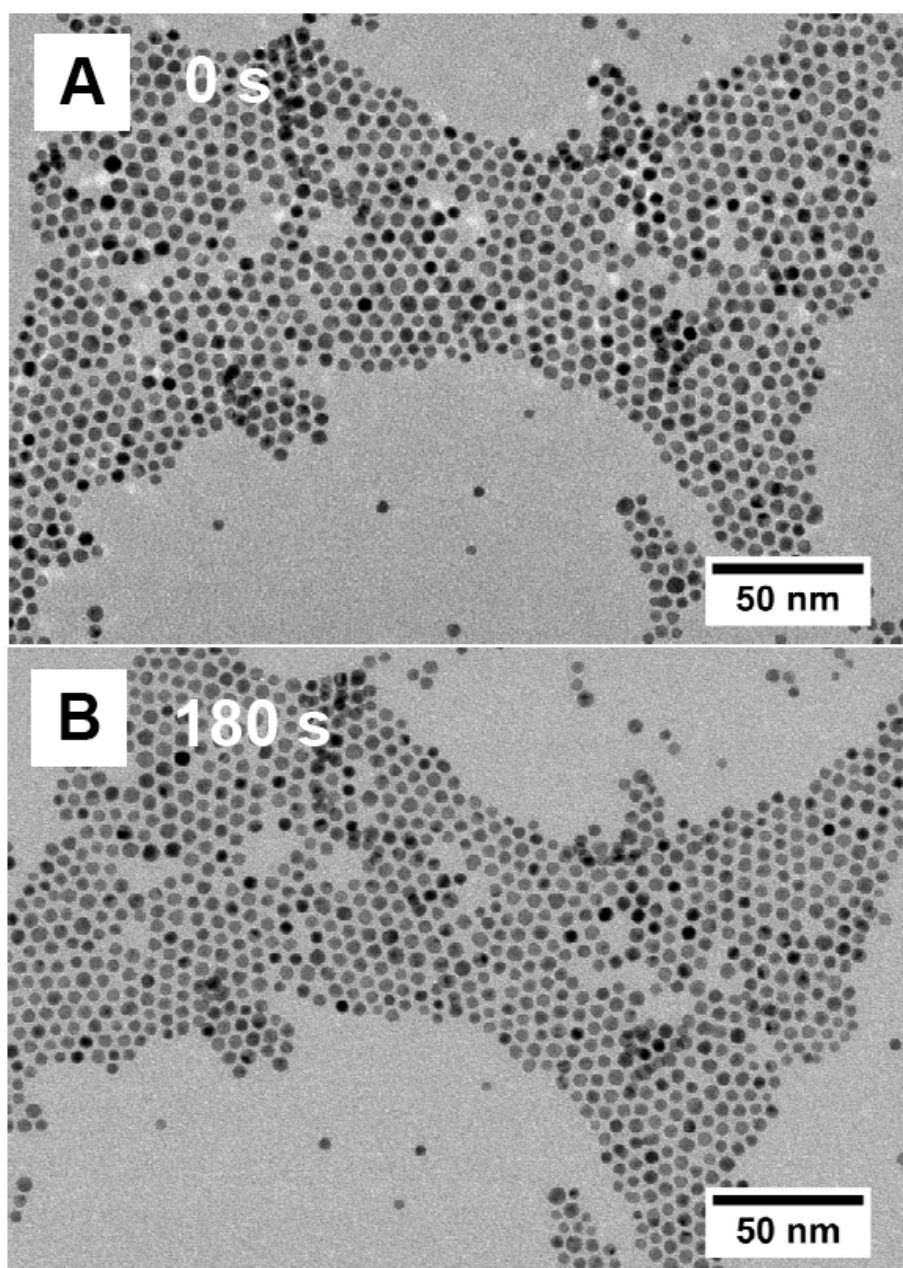

**Figure S8.** TEM images of  $^{\text{NHC}}\text{Au}^{10}$  deposited on a TEM grid covered by amorphous carbon before (A) and after (B) oxygen plasma exposure for 180 s at 10 W.



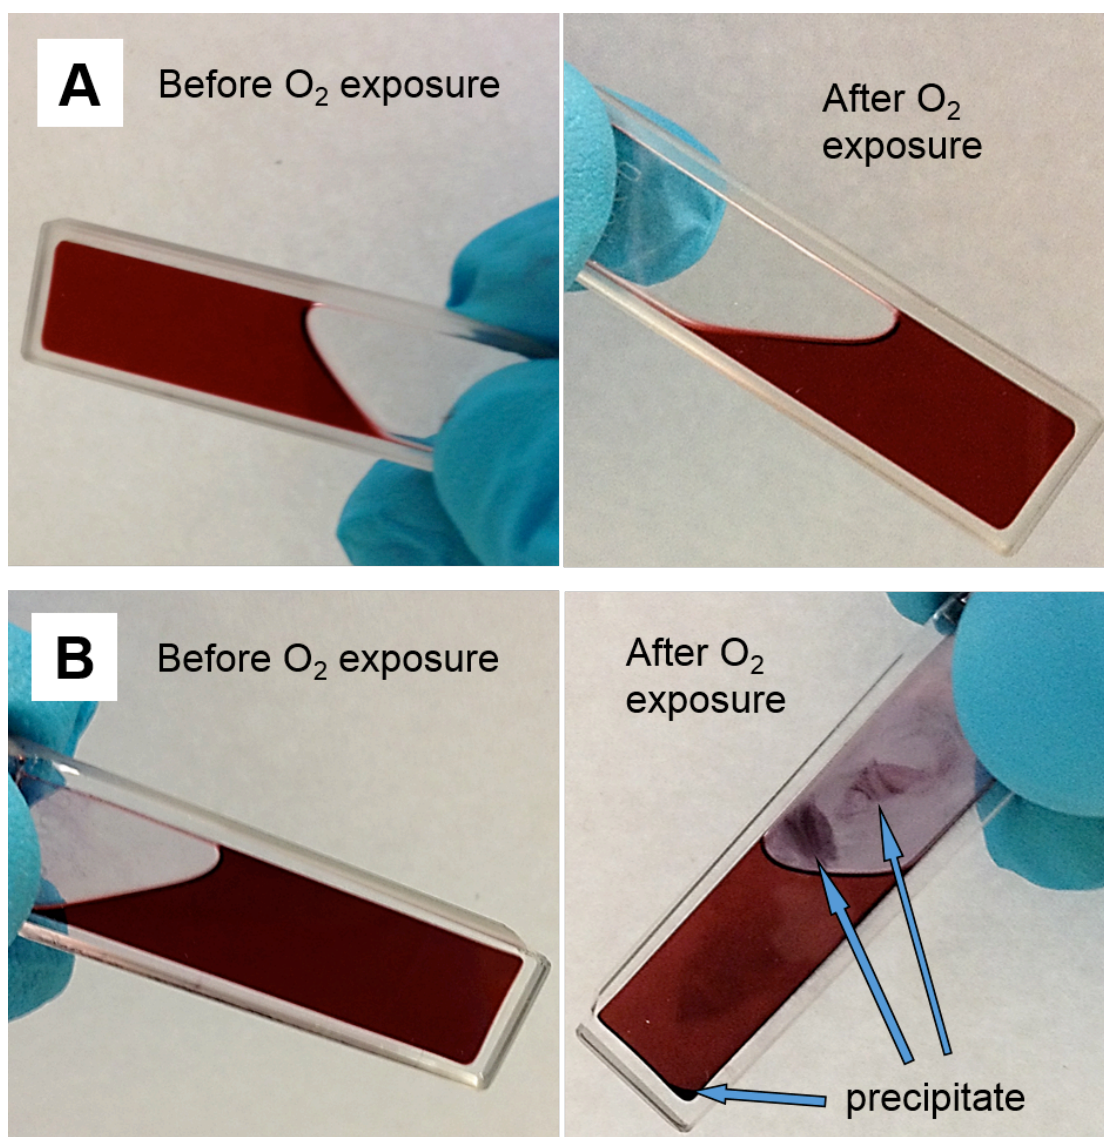

**Figure S9.** Photographs of dispersions in toluene of  $\text{NHC-Au}^{10}$  (A) and  $\text{DDT-Au}^2$  (B), before (left) and after (right) one-week exposure to molecular oxygen at c.a. 1 atm. The dry NC samples were taken off with 0.6 mL of toluene, transferred into the vial and diluted 10 times ( $\text{DDT-Au}^2$ ) or 12 times ( $\text{NHC-Au}^{10}$ ) with toluene to increase the transparency of the solution.

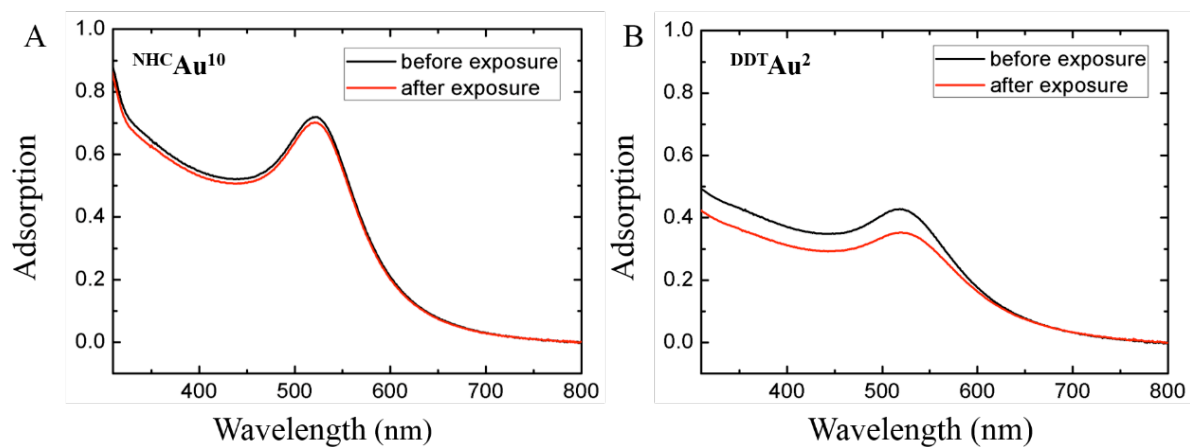

**Figure S10.** UV-Vis spectra of  $\text{NHC-Au}^{10}$  (A) and  $\text{DDT-Au}^2$  (B) in toluene before and after one-week exposure to  $\text{O}_2$  (1 Atm). A suspension of 1 mg of Au NCs in toluene (1 mL) was initially prepared, then diluted 20 times with toluene for the analysis.

## Display Report

### Analysis Info

Analysis Name D:\Data\GOBS\Xiang\Xiang NHC-5.d  
 Method tune\_wide.m  
 Sample Name Xiang NHC-5  
 Comment

Acquisition Date 6/8/2015 11:16:23 AM

Operator BDAL@DE  
 Instrument / Ser# micrOTOF 235

### Acquisition Parameter

|             |            |                      |          |                  |           |
|-------------|------------|----------------------|----------|------------------|-----------|
| Source Type | ESI        | Ion Polarity         | Positive | Set Nebulizer    | 5.8 psi   |
| Focus       | Not active |                      |          | Set Dry Heater   | 180 °C    |
| Scan Begin  | 50 m/z     | Set Capillary        | 4500 V   | Set Dry Gas      | 4.0 l/min |
| Scan End    | 3000 m/z   | Set End Plate Offset | -500 V   | Set Divert Valve | Source    |

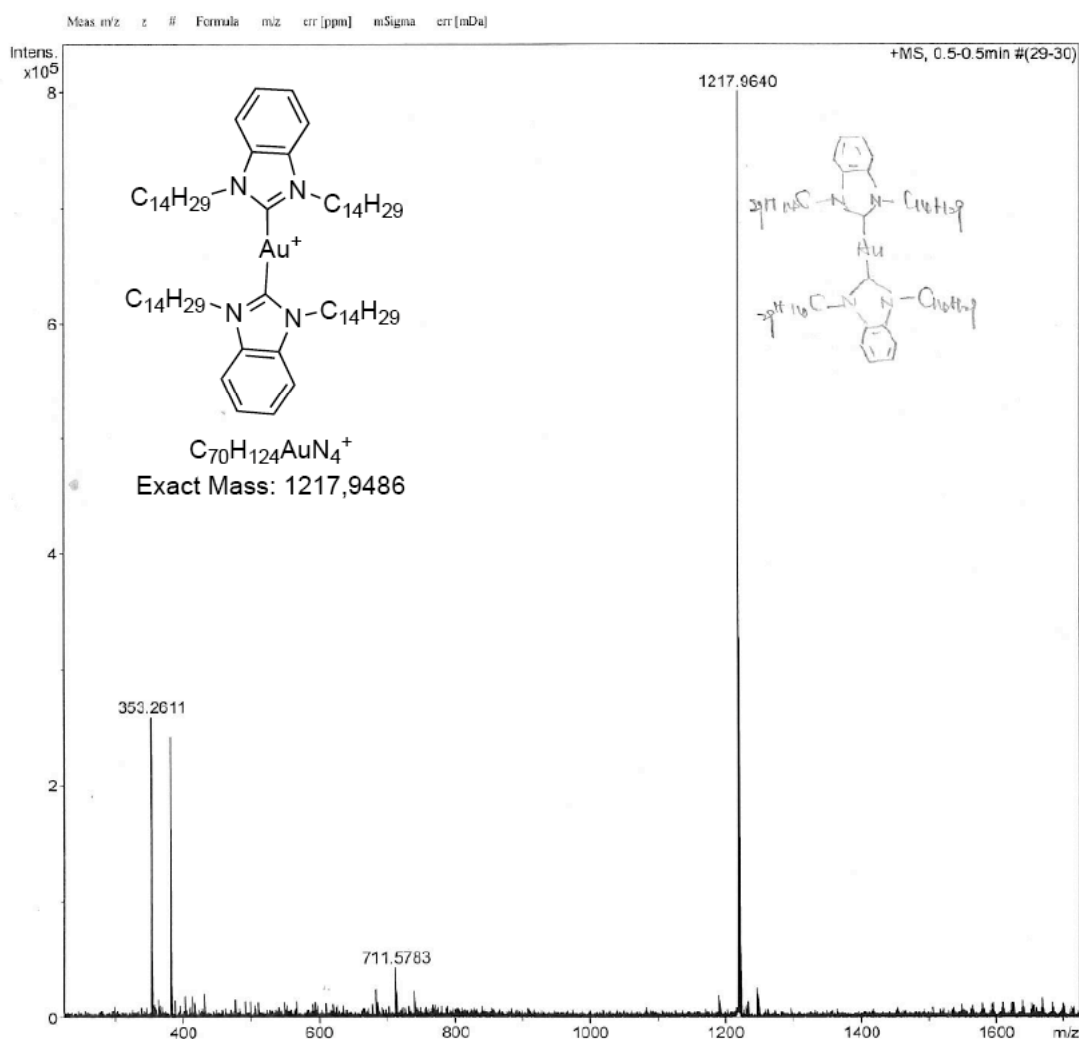

Bruker Compass DataAnalysis 4.0

printed: 6/8/2015 11:19:47 AM

Page 1 of 1

**Figure S11.** O<sub>2</sub> treatment of <sup>NHC</sup>Au<sup>10</sup> for one week : Mass spectrum of the supernatant after dispersion of the NCs in toluene, precipitation with methanol and centrifugation.

## Display Report

|                      |                                                       |                   |                      |
|----------------------|-------------------------------------------------------|-------------------|----------------------|
| <b>Analysis Info</b> |                                                       | Acquisition Date  | 7/24/2015 4:47:48 PM |
| Analysis Name        | D:\Data\GOBS\Kiang\Kiang-au10-before o2-supernatant.d | Operator          | BDAL@DE              |
| Method               | tune_low.m                                            | Instrument / Ser# | micrOTOF 235         |
| Sample Name          | Kiang-au10-before o2-supernatant                      |                   |                      |
| Comment              |                                                       |                   |                      |

|                              |            |                      |          |                  |           |
|------------------------------|------------|----------------------|----------|------------------|-----------|
| <b>Acquisition Parameter</b> |            |                      |          |                  |           |
| Source Type                  | ESI        | Ion Polarity         | Positive | Set Nebulizer    | 5.8 psi   |
| Focus                        | Not active |                      |          | Set Dry Heater   | 180 °C    |
| Scan Begin                   | 50 m/z     | Set Capillary        | 4500 V   | Set Dry Gas      | 4.0 l/min |
| Scan End                     | 3000 m/z   | Set End Plate Offset | -500 V   | Set Divert Valve | Waste     |

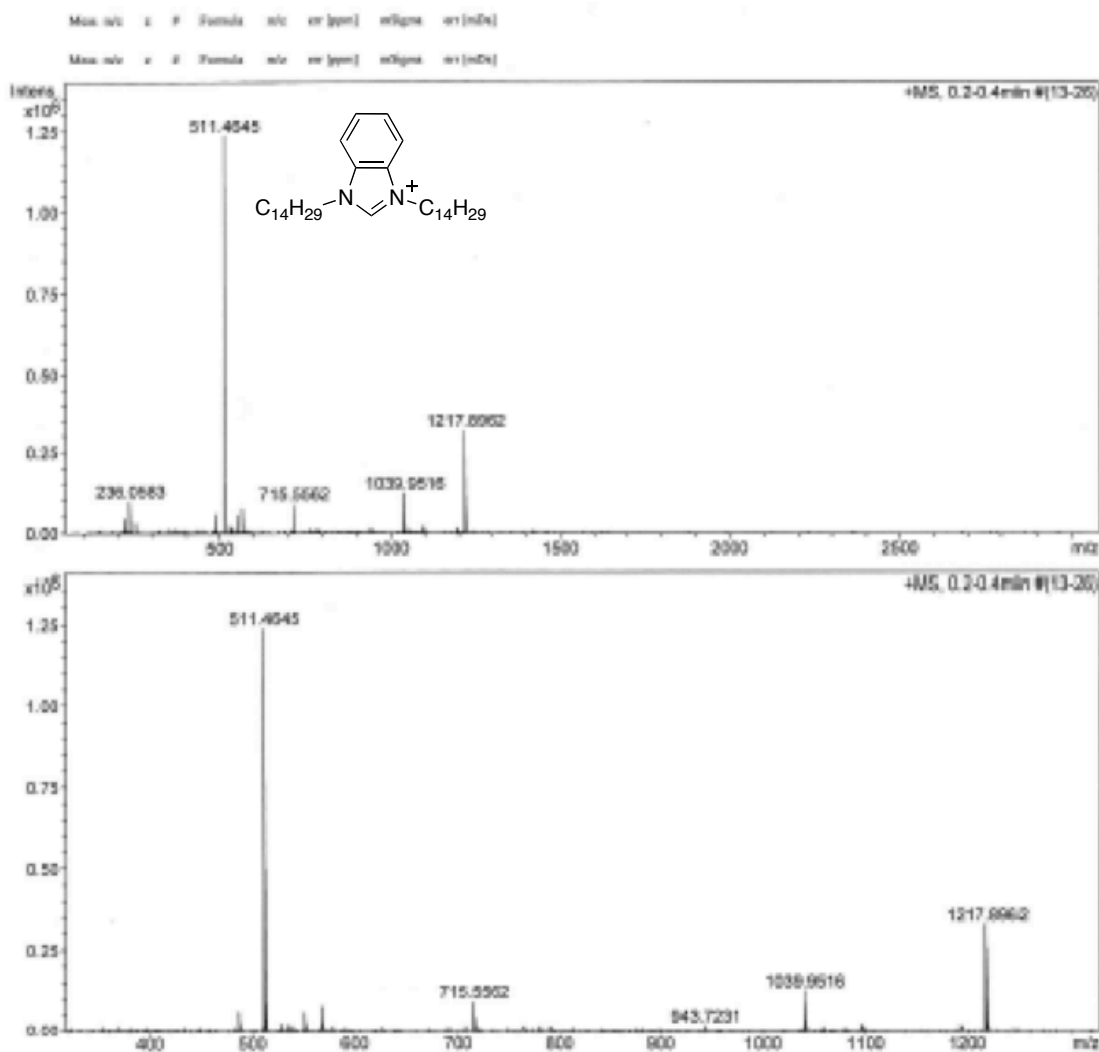

**Figure S12.** Mass spectrum of the supernatant from  $\text{NHC-Au}^{10}$  without  $\text{O}_2$  treatment, after dispersion of the NCs in toluene, precipitation with methanol and centrifugation.

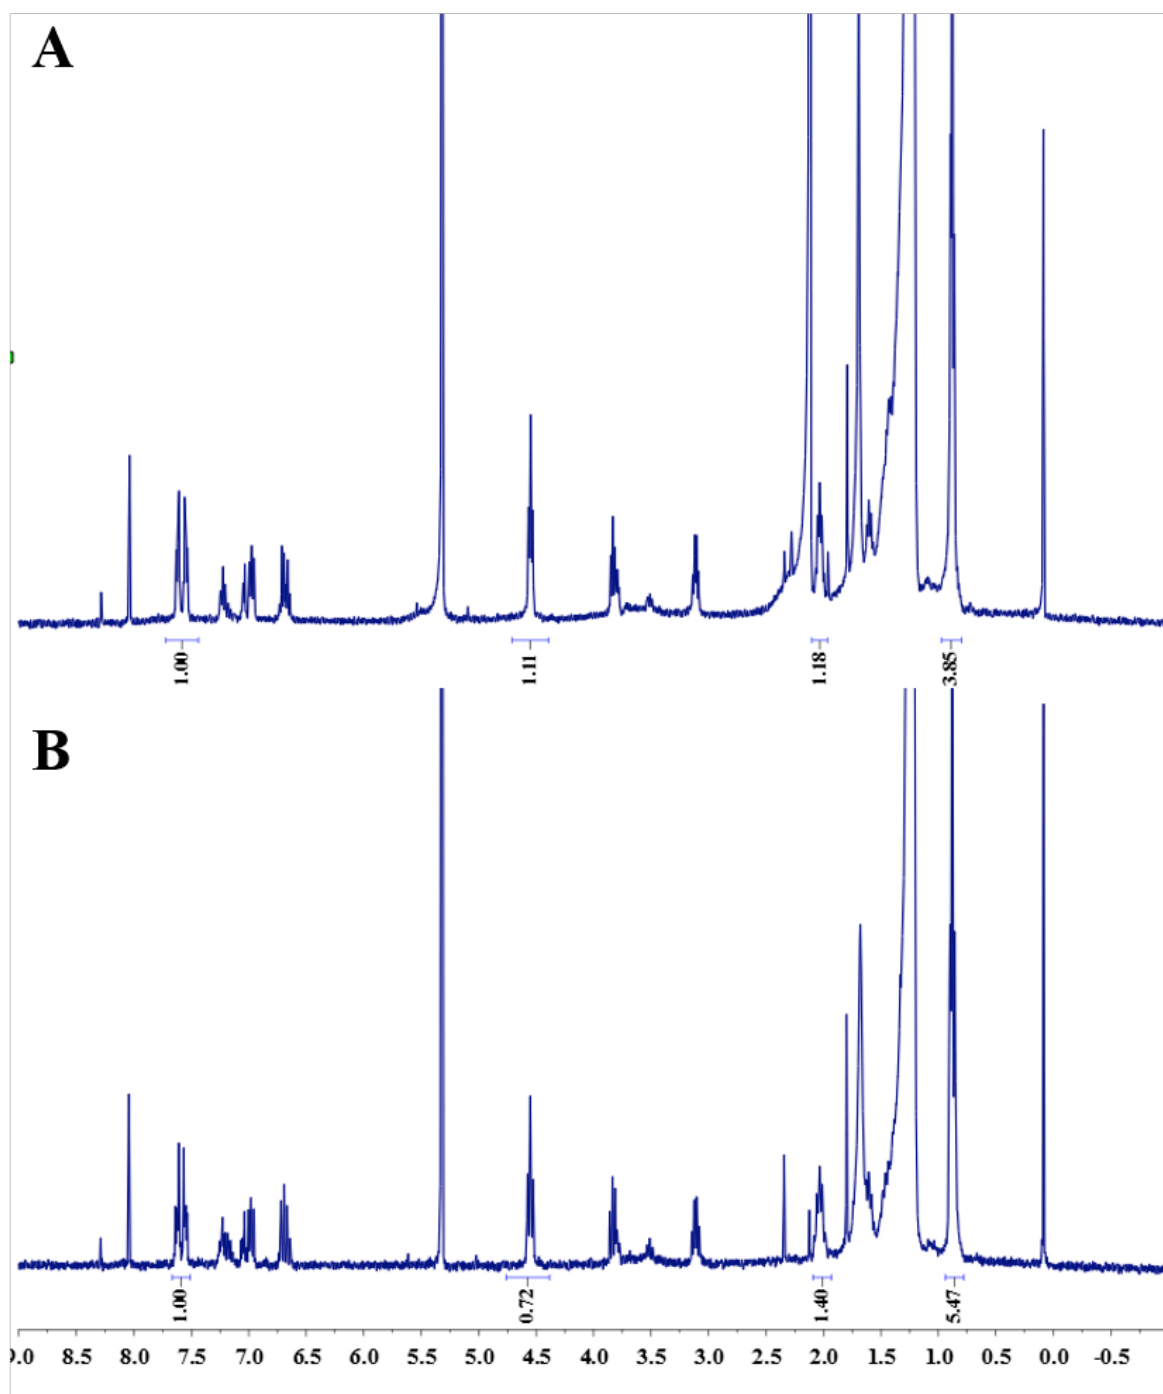

**Figure S13.**  $^1\text{H}$  NMR spectra (400 MHz) of  $^{\text{NHC}}\text{Au}^{10}$  in  $\text{CD}_2\text{Cl}_2$  before (A), and after (B) one-week exposure to nitrogen ( $\text{N}_2$ ). A sample of  $^{\text{NHC}}\text{Au}^{10}$  before size selection (see experimental) was analyzed to have the maximum amount of matter for the experiment.



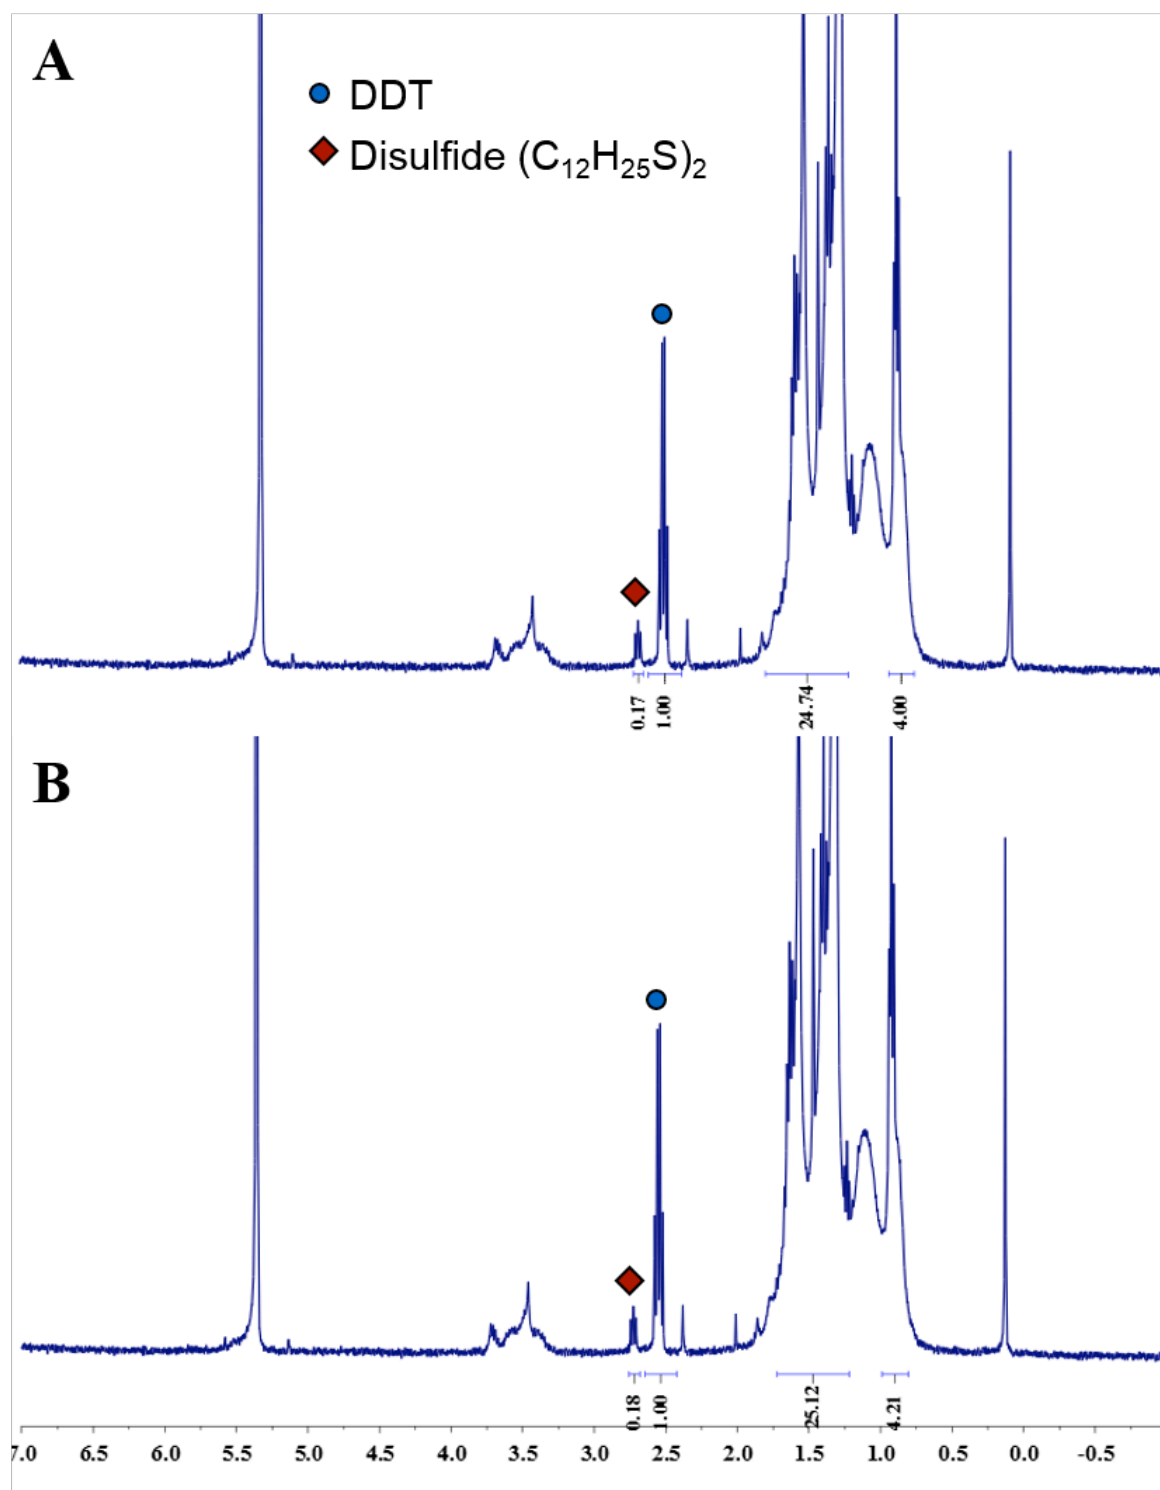

**Figure S14.**  $^1\text{H}$  NMR spectra of  $^{\text{DDT}}\text{Au}^2$  before (A), and after (B) one-week exposure to nitrogen ( $\text{N}_2$ ).

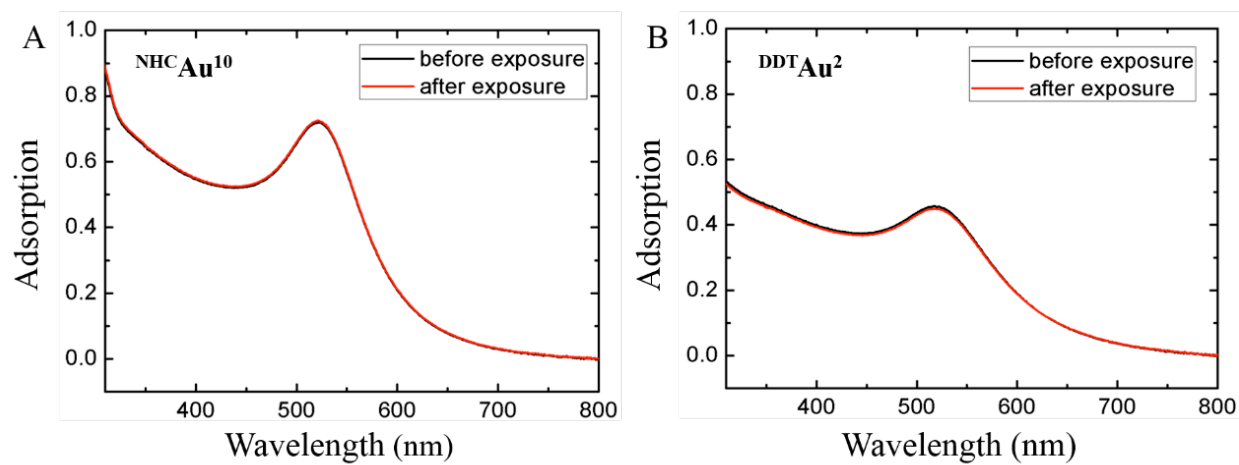

**Figure S15.** UV-Vis spectra of <sup>NHC</sup>Au<sup>10</sup> (A) and <sup>DDT</sup>Au<sup>2</sup> (B) in toluene before and after one-week exposure to N<sub>2</sub>. A suspension of 1 mg of Au NCs in toluene (1 mL) was initially prepared, then diluted 20 times with toluene for the analysis.
